# Supplementary material for: Intravenous infusion route in maternal resuscitation: a scoping review
Source: BMC Emerg Med. 2021 Dec 3;21:151. doi: 10.1186/s12873-021-00546-9 (PMC8642880; doi:10.1186/s12873-021-00546-9)
Supplement: Supplementary file 2 — Additional file 2. Supplementary Material 2: full-text reference list assessed for eligibility [file 12873_2021_546_MOESM2_ESM.xlsx]

## Sheet: full text.csv
number	Title	Authors	Abstract	Published Year	Journal	Volume	Issue	Pages	Study
1	Haemodynamic consequences and uterine contractions following 0.5 or 1.0 litre crystalloid infusion before obstetric epidural analgesia	Zamora, J. E.; Rosaeg, O. P.; Lindsay, M. P.; Crossan, M. L.	Purpose: The efficacy of infusion of 0.5 L and 1.0 L Ringer's lactate (LR) to prevent hypotension during induction of obstetric analgesia was studied. The effect of the different fluid boluses on fetal heart rate (FHR) and frequency of uterine contractions were also determined. Method(s): Ninety-two ASA 1-2 parturients were randomized to receive 0.5 L (Group 1) and 1.0 L (Group 2) LR immediately …	1996	Canadian Journal of Anaesthesia	43	4	347-352	Zamora 1996
2	Comparative effect of 6% hydroxyethyl starch (containing 1% dextrose) and lactated Ringer's solution for cesarean section under spinal anesthesia	Yorozu, T.; Morisaki, H.; Kondoh, M.; Zenfuku, M.; Shigematsu, T.	Purpose. This study aimed to compare low-molecular weight hydroxyethyl starch containing 1% dextrose (HES) infusion and lactated Ringer's solution (LR) in the prevention of hypotension associated with spinal anesthesia for cesarean section. Methods. Sixty-seven patients scheduled for cesarean section under spinal anesthesia were randomly allocated to receive either LR (n = 35) or HES (n = 32) inf…	2002	Journal of Anesthesia	16	3	203-206	Yorozu 2002
3	Intravenous fluid temperature, shivering, and the parturient	Workhoven, M. N.	The effect of warmed vs room-temperature intravenous fluids is examined for decreasing shivering in parturients undergoing epidural anesthesia for elective cesarean sections. Forty-four women were studied, 22 receiving warmed and 22 receiving room-temperature fluid therapy for preblock prophylaxis of hypotension and intraoperative maintenance and replacement. Of those given room-temperature balan…	1986	Anesth Analg	65	5	496-8	Workhoven 1986
4	Guidelines for Antenatal and Preoperative care in Cesarean Delivery: Enhanced Recovery After Surgery Society Recommendations (Part 1)	Wilson, R. D.; Caughey, A. B.; Wood, S. L.; Macones, G. A.; Wrench, I. J.; Huang, J.; Norman, M.; Pettersson, K.; Fawcett, W. J.; Shalabi, M. M.; Metcalfe, A.; Gramlich, L.; Nelson, G.	This Enhanced Recovery After Surgery (ERAS) Guideline for perioperative care in cesarean delivery will provide best practice, evidenced-based, recommendations for preoperative, intraoperative, and postoperative phases with, primarily, a maternal focus. The focused pathway process for scheduled and unscheduled cesarean delivery for this ERAS Cesarean Delivery Guideline will consider from the time …	2018	American Journal of Obstetrics and Gynecology	219	6	523.e1-523.e15	Wilson 2018
6	Efficacy of intrauterine resuscitation techniques in improving fetal oxygen status during labor	Simpson, K. R.; James, D. C.	OBJECTIVE: To evaluate the efficacy of 3 common intrauterine resuscitation techniques used during labor. METHOD(S): Intrauterine resuscitation techniques were prospectively evaluated in healthy women during labor. Forty-two women were randomized to either a 500-mL or 1,000-mL intravenous (IV) fluid bolus over 20 minutes. Fifty-one women were randomized to 1 of 6 position sequences including supin…	2005	Obstetrics and Gynecology	105	6	1362-1368	Simpson 2005
7	Intrauterine Resuscitation During Labor: Review of Current Methods and Supportive Evidence	Simpson, K. R.	When the fetal heart rate pattern is suggestive of fetal compromise during labor, various methods to promote fetal well-being are traditionally initiated. They include maternal repositioning, reduction of uterine activity, an intravenous fluid bolus, oxygen administration, correction of maternal hypotension, amnioinfusion, and alteration of second-stage labor pushing efforts. Although these intra…	2007	Journal of Midwifery and Women's Health	52	3	229-237	Simpson 2007
8	Tranexamic Acid for the Prevention of Blood Loss after Vaginal Delivery	Sentilhes, L.; Winer, N.; Azria, E.; Senat, M. V.; Le Ray, C.; Vardon, D.; Perrotin, F.; Desbriere, R.; Fuchs, F.; Kayem, G.; Ducarme, G.; Doret-Dion, M.; Huissoud, C.; Bohec, C.; Deruelle, P.; Darsonval, A.; Chretien, J. M.; Seco, A.; Daniel, V.; Deneux-Tharaux, C.; Groupe de Recherche en Obstetrique et, Gynecologie	BACKGROUND: The use of tranexamic acid reduces mortality due to postpartum hemorrhage. We investigated whether the prophylactic administration of tranexamic acid in addition to prophylactic oxytocin in women with vaginal delivery would decrease the incidence of postpartum hemorrhage. METHODS: In a multicenter, double-blind, randomized, controlled trial, we randomly assigned women in labor who had…	2018	N Engl J Med	379	8	731-742	Sentilhes 2018
9	Study protocol. TRAAP - TRAnexamic Acid for Preventing postpartum hemorrhage after vaginal delivery: A multicenter randomized, double-blind, placebo-controlled trial	Sentilhes, L.; Daniel, V.; Darsonval, A.; Deruelle, P.; Vardon, D.; Perrotin, F.; Le Ray, C.; Senat, M. V.; Winer, N.; Maillard, F.; Deneux-Tharaux, C.	Background: Postpartum hemorrhage (PPH) is a major cause of maternal mortality, accounting for one quarter of all maternal deaths worldwide. Estimates of its incidence in the literature vary widely, from 3 % to 15 % of deliveries. Uterotonics after birth are the only intervention that has been shown to be effective in preventing PPH. Tranexamic acid (TXA), an antifibrinolytic agent, has been inve…	2015	BMC Pregnancy and Childbirth	15 (1) (no pagination)	135		Sentilhes 2015
13	Pressor, heart rate and plasma catecholamine responses to noradrenaline in pregnant and nonpregnant women	Ramsay, M. M.; Broughton Pipkin, F.; Rubin, P. C.	OBJECTIVE: To study cardiovascular responses to noradrenaline during early pregnancy. DESIGN: Administration of incremental intravenous infusions of noradrenaline under basal conditions. SETTING: University Hospital, Nottingham. SUBJECTS: Nineteen women admitted for termination of pregnancy in first or second trimester and 18 nonpregnant women as control subjects. INTERVENTIONS: Recordings of blo…	1993	Br J Obstet Gynaecol	100	2	170-6	Ramsay 1993
15	Effect of intravenous fluid preload on vasoactive peptide secretion during Caesarean section under spinal anaesthesia	Pouta, A. M.; Karinen, J.; Vuolteenaho, O. J.; Laatikainen, T. J.	The endogenous release of the vasoactive peptides atrial natriuretic peptide and endothelin-1 may modify maternal haemodynamic responses to a rapid intravenous volume load used to prevent hypotension at elective Caesarean delivery under spinal anaesthesia. Twenty-two healthy pregnant women were examined during elective Caesarean section at term pregnancy. They were randomly assigned to receive ei…	1996	Anaesthesia	51	2	128-132	Pouta 1996
19	Norepinephrine Intermittent Intravenous Boluses to Prevent Hypotension During Spinal Anesthesia for Cesarean Delivery: A Sequential Allocation Dose-Finding Study	Onwochei, D. N.; Ngan Kee, W. D.; Fung, L.; Downey, K.; Ye, X. Y.; Carvalho, J. C. A.	BACKGROUND: The use of phenylephrine as the first-line agent for prevention and treatment of maternal hypotension during cesarean delivery (CD) may reduce cardiac output, posing a theoretical risk to mother and fetus. Norepinephrine has been suggested as a potential alternative, because its beta-adrenergic effects might result in greater heart rate and cardiac output than phenylephrine. The use o…	2017	Anesth Analg	125	1	212-218	Onwochei 2017
22	Closed-Loop Feedback Computer-Controlled Phenylephrine for Maintenance of Blood Pressure During Spinal Anesthesia for Cesarean Delivery: A Randomized Trial Comparing Automated Boluses Versus Infusion	Ngan Kee, W. D.; Tam, Y. H.; Khaw, K. S.; Ng, F. F.; Lee, S. W. Y.	BACKGROUND: We previously described the use of closed-loop feedback computer-controlled infusion of phenylephrine for maintaining blood pressure (BP) during spinal anesthesia for cesarean delivery. In this study, we report a modified system in which phenylephrine is delivered by intermittent boluses rather than infusion. We hypothesized that the use of computer-controlled boluses would result in …	2017	Anesth Analg	125	1	117-123	NganKee 2017
24	Prophylactic Norepinephrine Infusion for Preventing Hypotension During Spinal Anesthesia for Cesarean Delivery	Ngan Kee, W. D.; Lee, S. W. Y.; Ng, F. F.; Khaw, K. S.	BACKGROUND: The use of norepinephrine for maintaining blood pressure (BP) during spinal anesthesia for cesarean delivery has been described recently. However, its administration by titrated manually controlled infusion in this context has not been evaluated. METHODS: In a double-blinded, randomized controlled trial, 110 healthy women having spinal anesthesia for elective cesarean delivery were ra…	2018	Anesth Analg	126	6	1989-1994	NganKee 2018
25	A randomized double-blinded comparison of phenylephrine and ephedrine infusion combinations to maintain blood pressure during spinal anesthesia for cesarean delivery: the effects on fetal acid-base status and hemodynamic control	Ngan Kee, W. D.; Lee, A.; Khaw, K. S.; Ng, F. F.; Karmakar, M. K.; Gin, T.	BACKGROUND: Phenylephrine and ephedrine are both used to maintain arterial blood pressure during spinal anesthesia for cesarean delivery. Usually, either drug is given alone but several previous studies have described combining the drugs. However, the effect of varying the proportion of vasopressors in such combinations has not been reported. METHODS: One-hundred-twenty-five parturients having sp…	2008	Anesth Analg	107	4	1295-302	NganKee 2008
26	Prophylactic phenylephrine infusion for preventing hypotension during spinal anesthesia for cesarean delivery	Ngan Kee, W. D.; Khaw, K. S.; Ng, F. F.; Lee, B. B.	UNLABELLED: In a randomized, double-blinded, controlled trial, we investigated the prophylactic infusion of IV phenylephrine for the prevention of hypotension during spinal anesthesia for cesarean delivery. Immediately after intrathecal injection, phenylephrine was infused at 100 microg/min (n = 26) for 3 min. From that point until delivery, phenylephrine was infused at 100 microg/min whenever sy…	2004	Anesth Analg	98	3	815-21, table of contents	NganKee 2004
27	Comparison of phenylephrine infusion regimens for maintaining maternal blood pressure during spinal anaesthesia for Caesarean section	Ngan Kee, W. D.; Khaw, K. S.; Ng, F. F.	BACKGROUND: During spinal anaesthesia for Caesarean section, the optimal phenylephrine regimen and the optimal blood pressure (BP) to which it should be titrated are undetermined. The ideal regimen would balance efficacy for maintaining uteroplacental perfusion pressure against potential for uteroplacental vasoconstriction, both of which may affect fetal acid-base status. We compared phenylephrin…	2004	Br J Anaesth	92	4	469-74	NganKee 2004
28	A dose-response study of prophylactic intravenous ephedrine for the prevention of hypotension during spinal anesthesia for cesarean delivery	Ngan Kee, W. D.; Khaw, K. S.; Lee, B. B.; Lau, T. K.; Gin, T.	UNLABELLED: We performed a randomized, double-blinded dose-finding study of IV ephedrine for prophylaxis for hypotension in 80 women who received an IV crystalloid preload and spinal anesthesia for elective cesarean delivery. One minute after the intrathecal injection, patients were given saline control or ephedrine 10, 20, or 30 mg IV for 30 s. Systolic arterial pressure (SAP) in the first 12 mi…	2000	Anesth Analg	90	6	1390-5	NganKee 2000
29	A Random-allocation Graded Dose-Response Study of Norepinephrine and Phenylephrine for Treating Hypotension during Spinal Anesthesia for Cesarean Delivery	Ngan Kee, W. D.	BACKGROUND: Norepinephrine has been investigated as a potential alterative to phenylephrine for maintaining blood pressure during spinal anesthesia for cesarean delivery with the advantage of less depression of maternal heart rate and cardiac output. However, the relative potencies of these two vasopressors have not been fully determined in this context. METHODS: In a random-allocation, graded do…	2017	Anesthesiology	127	6	934-941	NganKee 2017
33	A randomised double-blind trial of phenylephrine and metaraminol infusions for prevention of hypotension during spinal and combined spinal-epidural anaesthesia for elective caesarean section	McDonnell, N. J.; Paech, M. J.; Muchatuta, N. A.; Hillyard, S.; Nathan, E. A.	Prophylactic vasopressor administration is commonly recommended to reduce maternal hypotension during spinal anaesthesia for caesarean section. Metaraminol has undergone limited investigation in obstetric anaesthesia for this purpose, particularly in comparison with phenylephrine. In this multicentre, randomised, double-blind, non-inferiority study, we compared prophylactic phenylephrine or metar…	2017	Anaesthesia	72	5	609-617	McDonnell 2017
34	Clostridium septicum infection in a young pregnant patient	McDonald, R. E.; Moola, S.	This report describes a young pregnant woman who presented to a rural emergency department with vaginal bleeding at 7 weeks of gestation. Initially, the patient was stable; however, within 8 h the patient deteriorated into fulminant septic shock. She required aggressive resuscitation and surgical management of a septic abortion. The patient's condition improved rapidly following surgical evacuati…	2012	BMJ Case Rep	5		5	McDonald 2012
35	Prevention and treatment of hypotension during central neural block	McCrae, A. F.; Wildsmith, J. A.	Hypotension during central neural block may occur by three main mechanisms: decrease in venous return (in turn influenced by posture, bleeding and inferior vena cava compression), vasodilatation and decreased cardiac output. It is also important to recognize that, occasionally, other factors play a part. Bladder distension during central nerve block has been shown to produce hypotension inappropr…	1993	Br J Anaesth	70	6	672-80	McCrae 1993
38	Intravenous albumin administration for prevention of spinal hypotension during cesarean section	Mathru, M.; Rao, T. L.; Kartha, R. K.; Shanmugham, M.; Jacobs, H. K.	Five percent albumin in Ringer's lactate with 5% dextrose solution (D5RL) (15 ml/kg) was prophylactically infused preanesthetically over 15 to 20 minutes to prevent hypotension during spinal anesthesia in 46 patients undergoing elective cesarean section. Apgar scores and the incidence and severity of hypotension were compared to results obtained in 41 patients who were given D5RL solution without…	1980	Anesth Analg	59	9	655-8	Mathru 1980
41	Cardiac arrest during sulprostone administration - A case report	Lampati, L.; Colantonio, L. B.; Calderini, E.	Sulprostone, a synthetic prostaglandin analogue with potent uterotonic action, has been shown to have a low complication rate in a large series. We present a case of cardiac arrest in a parturient after Caesarean section during continuous infusion of intravenous sulprostone administered for atonic post-partum haemorrhage. She had cardiopulmonary resuscitation for 25 min before spontaneous circula…	2013	Acta Anaesthesiologica Scandinavica	57	3	395-397	Lampati 2013
44	Prophylactic ephedrine and hypotension associated with spinal anesthesia for cesarean delivery	King, S. W.; Rosen, M. A.	Hypotension commonly accompanies induction of spinal anesthesia for cesarean section. To determine whether intravenous ephedrine prophylaxis would benefit prehydrated obstetrical patients presenting for elective cesarean section, we studied 30 patients randomly assigned to one of three experimental groups. All patients were preloaded with crystalloid (15 ml/kg), given spinal anesthesia and positi…	1998	International Journal of Obstetric Anesthesia	7	1	18-22	King 1998
49	Prophylactic intravenous preloading for regional analgesia in labour	Hofmeyr, G. J.	BACKGROUND: Fetal heart rate changes are common following regional analgesia (epidural or spinal) during labour. Reduced uterine blood flow from maternal hypotension (low blood pressure) may contribute to this. Intravenous fluid preloading (volume expansion) may help to reduce maternal hypotension. Newer protocols using weaker solutions of local anaesthetic, and opioid only blocks, may reduce the…	2002	Cochrane database of systematic reviews (Online)		2	CD000175	Hofmeyr 2002
50	Prophylactic intravenous preloading for regional analgesia in labour	Hofmeyr, G.; Cyna, A.; Middleton, P.	BACKGROUND: Reduced uterine blood flow from maternal hypotension may contribute to fetal heart rate changes which are common following regional analgesia (epidural or spinal or combined spinal-epidural (CSE)) during labour. Intravenous fluid preloading may help to reduce maternal hypotension but using lower doses of local anaesthetic, and opioid only blocks, may reduce the need for preloading. OB…	2004	Cochrane database of systematic reviews (Online)		4	CD000175	Hofmeyr 2004
51	Acute revascularization therapy in pregnant patients	Hirano, T.	Ischemic stroke is uncommon during pregnancy, but decision making for acute revascularization therapy including intravenous recombinant tissue plasminogen activator (rt-PA) is difficult. The use of rt-PA remains controversial, but a systematic review of 16 patients (mean age 31.7 years) showed good results for both maternal (77.8%) and fetal (56.3%) outcomes. Pregnancy alone is not a solid contra…	2013	Neurologia Medico-Chirurgica	53	8	531-536	Hirano 2013
52	Norepinephrine Infusion for Preventing Postspinal Anesthesia Hypotension during Cesarean Delivery: A Randomized Dose-finding Trial	Hasanin, A. M.; Amin, S. M.; Agiza, N. A.; Elsayed, M. K.; Refaat, S.; Hussein, H. A.; Rouk, T. I.; Alrahmany, M.; Elsayad, M. E.; Elshafaei, K. A.; Refaie, A.	BACKGROUND: Norepinephrine has been recently introduced for prophylaxis against postspinal hypotension during cesarean delivery; however, no data are available regarding its optimum dose. The objective of this study is to compare three infusion rates of norepinephrine for prophylaxis against postspinal hypotension during cesarean delivery. METHODS: The authors conducted a double-blinded, randomiz…	2019	Anesthesiology	130	1	55-62	Hasanin 2019
53	The role of intravenous amino acid infusion in oligohydramnios	Gupta, R.; Porwal, S. K.; Swarnkar, M.; Gupta, S.	Oligohydramnios means the fetus is in a compromised condition. Ante partum amniotic fluid index (A.F.I.) assessment is one of the reliable, good predictor and standard technique for assessment of fetal well-being in antenatal period. In the present study 25 cases of Oligohydramnios in the third trimester were given intravenous amino acid in 1000cc of 10% fructodex drip on 1st day and the amino ac…	2012	International Journal of Pharmaceutical Sciences and Research	3	10	3971-3974	Gupta 2012
56	A randomized trial of phenylephrine infusion versus bolus dosing for nausea and vomiting during Cesarean delivery in obese women	George, R. B.; McKeen, D. M.; Dominguez, J. E.; Allen, T. K.; Doyle, P. A.; Habib, A. S.	PURPOSE: Hypotension is common after spinal anesthesia for Cesarean delivery. It is associated with nausea, vomiting, and fetal acidosis. Previous research on phenylephrine excluded obese subjects. We compared the incidence of intraoperative nausea and vomiting (IONV) in obese patients who received a prophylactic phenylephrine infusion vs those who received bolus dosing for the treatment of spina…	2018	Can J Anaesth	65	3	254-262	George 2018
58	A randomised controlled trial comparing two temporising management strategies, one with and one without plasma volume expansion, for severe and early onset pre-eclampsia	Ganzevoort, W.; Rep, A.; Bonsel, G. J.; Fetter, W. P. F.; Van Sonderen, L.; De Vries, J. I. P.; Wolf, H.	Objectives: Plasma volume expansion may benefit both mother and child in the temporising management of severe and early onset hypertensive disorders of pregnancy. Design(s): Randomised clinical trial. Setting(s): Two university hospitals in Amsterdam, The Netherlands. Population: Two hundred and sixteen patients with a gestational age between 24 and 34 completed weeks with severe pre-eclampsia, h…	2005	BJOG: An International Journal of Obstetrics and Gynaecology	112	10	1358-1368	Ganzevoort 2005
59	A randomized trial of plasma volume expansion in hypertensive disorders of pregnancy: Influence on the pulsatility indices of the fetal umbilical artery and middle cerebral artery	Ganzevoort, W.; Rep, A.; Bonsel, G. J.; De Vries, J. I. P.; Wolf, H.	The purpose of this study was to investigate the effect of plasma volume expansion on the pulsatility indices of the fetal umbilical and middle cerebral arteries. Two hundred sixteen patients with severe preeclampsia, HELLP (hemolysis, elevated liver enzymes, and low platelet count) syndrome, eclampsia, hypertension-related fetal growth restriction, and gestational ages between 24 and 34 complete…	2005	American Journal of Obstetrics and Gynecology	192	1	233-239	Ganzevoort 2005
62	Fluid and vasopressor management for Cesarean delivery under spinal anesthesia: Continuing Professional Development	Loubert, C.	Purpose The purpose of this Continuing Professional Development module is to review the physiology of maternal hypotension induced by spinal anesthesia in pregnant women, and the effects of fluids and vasopressors. Principal findings Maternal hypotension induced by spinal anesthesia is caused mainly by peripheral vasodilatation and is not usually associated with a decrease in cardiac output. Alth…	2012	Canadian Journal of Anesthesia	59	6	604-619	Loubert 2012
65	A dose-response meta-analysis of prophylactic intravenous ephedrine for the prevention of hypotension during spinal anesthesia for elective cesarean delivery	Lee, A.; Ngan Kee, W. D.; Gin, T.	UNLABELLED: We systematically reviewed available studies to determine the dose-response characteristics of prophylactic i.v. ephedrine for the prevention of hypotension during spinal anesthesia for cesarean delivery. We searched for randomized controlled trials (RCTs) or cohort studies-obtained through MEDLINE, EMBASE, the Cochrane Central Register of Controlled Trials, and reference lists of pub…	2004	Anesth Analg	98	2	483-90, table of contents	Lee 2004
69	RhuFVIIa reduces the rate of interventional second line therapies in severe primary postpartum haemorrhages resistant to uterotonics: A multicenter, randomised, open controlled trial	Lavigne-Lissalde, G.; Aya, G.; Mercier, F.; Chauleur, C.; Morau, E.; Ducloy-Bouthors, A. S.; Mignon, A.; Boehlen, F.; Gris, J. C.	Background: Postpartum haemorrhage (PPH) is the most common cause of obstetric haemorrhage. The early introduction of uterotonic agents is recommended as a first-line therapy, before specific interventional second-line therapies (uterine compression sutures, vascular ligations, embolisation, and hysterectomy). Recombinant human activated factor VII (RhuFVIIa, Novoseven, Novonordisk A/S Baagsvaerd…	2013	Journal of Thrombosis and Haemostasis	2)		78	Lavigne-Lissalde 2013
71	Maternal Pulse Pressure and the Risk of Postepidural Complications: A Randomized Controlled Trial	Lappen, J. R.; Myers, S. A.; Bolden, N.; Mercer, B. M.; Chien, E. K. S.	OBJECTIVE: To test the hypothesis that increasing the intravenous fluid bolus volume at the time of epidural placement in women with narrow pulse pressure would reduce postepidural fetal heart rate (FHR) abnormalities, hypotension, and resuscitative obstetric interventions. METHODS: We performed a single-center randomized controlled trial. Eligible participants were normotensive with a nonanomalo…	2017	Obstet Gynecol	130	6	1366-1376	Lappen 2017
73	Prophylactic intravenous ephedrine to minimize fetal bradycardia after combined spinal-epidural labour analgesia: a randomized controlled study	Gambling, D. R.; Bender, M.; Faron, S.; Glaser, D.; Farrell, T. R.	Background: The combined spinal-epidural (CSE) technique for relief of labour pain offers both rapid onset and superior first-stage analgesia. Nevertheless, the known increased risk for early profound fetal bradycardia (EPFB) following CSE continues to be a concern that often limits its use. The purpose of this study was to determine if giving prophylactic intravenous ephedrine at the time of CSE…	2015	Canadian Journal of Anesthesia	62	11	1201-1208	Gambling 2015
80	Multi-valvular infective endocarditis in pregnancy presenting with septic pulmonary emboli	English, N.; Weston, P.	Introduction Infective endocarditis in pregnancy is a rare and life threatening condition with an incidence of 0.006% and a maternal mortality of 15-30%. Intravenous drug use is becoming a more common risk factor among pregnant women and now accounts for up to 14% of cases. Case A 32-year-old gravida three, para two presented with dyspnoea and chest pain at 36 weeks gestation. She was tachycardic…	2015	BJOG: An International Journal of Obstetrics and Gynaecology	2)		270	English 2015
85	Comparison of Carbetocin and Oxytocin for the Prevention of Postpartum Hemorrhage Following Vaginal Delivery: A Double-Blind Randomized Trial	Boucher, M.; Nimrod, C. A.; Tawagi, G. F.; Meeker, T. A.; White, R. E. R.; Varin, J.	Objectives: To compare the efficacy of a single 100 mug intramuscular (IM) carbetocin injection, a long-acting oxytocin agonist, to a 2-hour 10 IU oxytocin intravenous (IV) infusion, in reducing the incidence and severity of postpartum hemorrhage (PPH) in women at risk for this condition. Method(s): A randomized, double-blind, placebo-controlled study was conducted at 2 hospital centres, includin…	2004	Journal of Obstetrics and Gynaecology Canada	26	5	481-488	Boucher 2004
87	Pharmacomechanical catheter-directed thrombolysis for pregnancy-related iliofemoral deep vein thrombosis	Bloom, A. I.; Farkas, A.; Kalish, Y.; Elchalal, U.; Spectre, G.	PURPOSE: Pharmacomechanical catheter-directed thrombolysis (PCDT) is relatively contraindicated during pregnancy and postpartum. The purpose of this study was to evaluate outcomes of PCDT in this population. MATERIALS AND METHODS: Data for 11 consecutive patients (aged 21-35 y) undergoing PCDT at a tertiary center for symptomatic pregnancy-related iliofemoral deep vein thrombosis (DVT) were retro…	2015	J Vasc Interv Radiol	26	7	992-1000	Bloom 2015
92	Management of hypertensive emergencies of pregnancy by hydralazine bolus injection vs continuous drip--a comparative study	Begum, M. R.; Quadir, E.; Begum, A.; Akhter, S.; Rahman, K.	This prospective study was conducted at Dhaka Medical College and Hospital, Bangladesh. The objective was to identify the time required to control high blood pressure levels in obstetric patients by injection of hydralazine in a bolus intravenous dose vs continuous drip. Seventy-seven patients with eclampsia and hypertensive emergencies comprised the target population. Patients were managed eithe…	2002	Medscape women's health	7	5	1	Begum 2002
101	Spontaneous intracranial hypotension during pregnancy	Asakura, H.; Hayashi, Z.; Seto, M.; Araki, T.	Background: Spontaneous intracranial hypotension is characterized by postural headache associated with low cerebrospinal fluid pressure. Case: A 37-year-old Japanese woman, gravida 3, para 2, had sudden onset of severe postural headache at 8 weeks' gestation, accompanied by nausea and vomiting. Results of medical and neurologic examinations were normal, and there was no measurable cerebrospinal f…	2001	Obstetrics and Gynecology	97	5	804-805	Asakura 2001
102	Maternal haemodynamics at elective caesarean section: a randomised comparison of oxytocin 5-unit bolus and placebo infusion with oxytocin 5-unit bolus and 30-unit infusion	McLeod, G.; Munishankar, B.; MacGregor, H.; Murphy, D. J.	BACKGROUND: Rapid intravenous injection of oxytocin is associated with marked hypotension secondary to decreased venous return. Reductions in dose and rate of bolus administration have reduced the incidence of cardiovascular side effects, but no study has yet investigated cardiovascular stability when oxytocin is infused for several hours after delivery. This study compared maternal haemodynamics…	2010	Int	19	2	155-60	McLeod 2010
103	Prevention of altered hemodynamics after spinal anesthesia: A comparison of volume preloading with tetrastarch, succinylated gelatin and ringer lactate solution for the patients undergoing lower segment caesarean section	Mitra, T.; Das, A.; Majumdar, S.; Bhattacharyya, T.; Mandal, R.; Hajra, B.	Background: Spinal anesthesia has replaced general anesthesia in obstetric practice. Hemodynamic instability is a common, but preventable complication of spinal anesthesia. Preloading the circulation with intravenous fluids is considered a safe and effective method of preventing hypotension following spinal anesthesia. We had conducted a study to compare the hemodynamic stability after volume pre…	2014	Saudi Journal of Anaesthesia	8	4	456-462	Mitra 2014
104	Randomised double-blind comparison of bolus phenylephrine or ephedrine for treatment of hypotension in women with pre-eclampsia undergoing caesarean section	Mohta, M.; Duggal, S.; Chilkoti, G. T.	Treatment of post-spinal hypotension during caesarean section assumes special concern in pre-eclamptic patients due to a compromised fetoplacental circulation and increased risk of placental hypoperfusion. Phenylephrine and ephedrine are the most commonly used vasopressors, although the best choice is still not clear. We studied 80 pre-eclamptic women with a singleton pregnancy who underwent caes…	2018	Anaesthesia	73	7	839-846	Mohta 2018
106	A randomised controlled trial of phenylephrine and noradrenaline boluses for treatment of postspinal hypotension during elective caesarean section	Mohta, M.; Garg, A.; Chilkoti, G. T.; Malhotra, R. K.	Phenylephrine is currently the vasopressor of choice during elective caesarean section, but it can cause reflex bradycardia. Noradrenaline, a potent alpha-agonist and weak beta-agonist, may be associated with a lower incidence of bradycardia. However, comparative information is limited. This double-blind randomised controlled trial compared the effects of 100 mug phenylephrine and 5 mug noradrena…	2019	Anaesthesia	74	7	850-855	Mohta 2019
107	Effect of different phenylephrine bolus doses for treatment of hypotension during spinal anaesthesia in patients undergoing elective caesarean section	Mohta, M.; Harisinghani, P.; Sethi, A. K.; Agarwal, D.	The efficacy of phenylephrine might be improved by giving doses higher than that traditionally used (100 micro g). This study compared the effects of three initial bolus doses of intravenous phenylephrine; 100 micro g (group P100), 125 micro g (group P125) and 150 micro g (group P150), for the treatment of post-spinal hypotension in patients undergoing elective caesarean delivery. If hypotension …	2015	Anaesth Intensive Care	43	1	74-80	Mohta 2015
109	Efficacy Of Phenylephrine Infusion Verses Colloid Preloading In Resolving Hypotension Due To Spinal Anaesthesia During Caesarean Section	Shah, A. A.; Rasool, A.; Alam, M. A.; Naseem, Y.; Rasool, M.; Hussain, A.; Jadoon, S.; Shah, E. H.; Malik, A. A.; Ahmed, N.; Salahudin	BACKGROUND: Spinal anaesthesia causes hypotension that is countered through various methods. Phenylephrine is a vasoconstrictor and haemocoel increases the intravascular vascular volume; both have an effect in preventing this hypotension; but their comparison has not been done in local setting. METHODS: Randomized control trial was conducted in month of June, 2017 at Ayub Teaching Hospital, Abbot…	2018	J Ayub Med Coll Abbottabad	30	3	377-380	Shah 2018
112	A case of cardiac tamponade due to an isolated abscess in the ascending aorta of a pregnant woman with a history of intravenous substance abuse	Shattuck, B.; Livingstone, J.	We describe the case of a 23-year-old white female, 10-12 weeks pregnant, with a history of intravenous drug use and a recently diagnosed pneumonia, who was found deceased in her bed after a night of sleep. Although postmortem serum toxicology tested positive for alprazolam, tetrahydrocannabinol, and morphine, the ultimate cause of death was determined to be cardiac tamponade secondary to an isol…	2017	Forensic science, medicine, and pathology	13	2	226-229	Shattuck 2017
114	ED95 of phenylephrine to prevent spinal-induced hypotension and/or nausea at elective cesarean delivery	Tanaka, M.; Balki, M.; Parkes, R. K.; Carvalho, J. C.	BACKGROUND: The purpose of this trial was to determine the 95% effective dose (ED95) of phenylephrine by intermittent i.v. bolus, to prevent spinal-induced hypotension and/or nausea at elective cesarean delivery. METHODS: The study was conducted in a double-blinded fashion in 50 patients undergoing elective cesarean delivery under spinal anesthesia. The dose of phenylephrine was determined using …	2009	Int	18	2	125-30	Tanaka 2009
115	Management of deep venous thrombosis and pulmonary embolism during pregnancy	Tawes, R. L., Jr.; Kennedy, P. A.; Harris, E. J.; Brown, W. H.; Scribner, R. G.; Sydorak, G. R.; Beare, J. P.	Despite venous stasis and a hypercoagulable state during pregnancy, the reported incidences of deep venous thrombosis and pulmonary embolism are remarkably low, about 1 in 2,000 and 1 in 10,000 cases, respectively. Mortality from antepartum thromboembolism has been reported in about 15 percent of untreated patients and less than 1 percent of treated patients. Adequate anticoagulant therapy signif…	1982	Am J Surg	144	1	141-5	Tawes 1982
116	Prevention of hypotension following spinal anaesthesia for caesarean section-comparison of volume preloading with ringer lactate & 6% hydroxyethyl starch (HES 130/0.4)	Singh, U.; Saha, U.	Background: Spinal anaesthesia (SA) has replaced general anaesthesia in obstetric practice. Hypotension is a common but preventable complication of SA. Preloading the circulation with intravenous fluids is considered a safe and effective method of preventing hypotension following SA. Patients & Methods: In the present study, 20 ml kg-<sup>1</sup> ringer lactate and 10ml kg- <sup>1</sup> HES 130/0…	2009	Journal of Anaesthesiology Clinical Pharmacology	25	1	54-58	Singh 2009
119	The hemodynamic effects of pregnancy on the lower extremity venous system	Taylor, J.; Hicks, C. W.; Heller, J. A.	Objective: Pregnancy has significant effects on the lower extremity venous system. Increasing venous pressure and blood volume, in combination with reduced flow rates within the deep veins, predisposes pregnant women to both primary and secondary chronic venous insufficiency (CVI). This review article highlights the specific physiologic and hemodynamic changes that occur during pregnancy and exam…	2018	Journal of Vascular Surgery: Venous and Lymphatic Disorders	6	2	246-255	Taylor 2018
120	The effect of colloid preload versus prophylactic ephedrine administration on QTc intervals during cesarean delivery: A randomized controlled study	Tor, I. H.; Aksoy, M.; Aksoy, A. N.; Ahiskalioglu, A.; Ince, I.; Kursad, H.	AIM: We aimed to investigate the effect of colloid infusion immediately before the spinal anesthesia, and the prophylactic intravenous (IV) infusion of ephedrine after injection of intrathecal bupivacaine on hemodynamic parameters, QT, The QT interval corrected for heart rate (QTc), and dispersion of QTc (QTcDisp) intervals in women undergoing the elective cesarean section. MATERIALS AND METHODS:…	2016	Nigerian journal of clinical practice	19	1	115-120	Tor 2016
121	Hemodynamic effects of simultaneous administration of intravenous ephedrine and spinal anesthesia for cesarean delivery	Tsen, L. C.; Boosalis, P.; Segal, S.; Datta, S.; Bader, A. M.	Study Objective: To evaluate the hemodynamic effects of an intravenous (IV) ephedrine bolus given simultaneously with spinal anesthesia for cesarean delivery. Design(s): Randomized, prospective, double-blind study. Setting(s): Tertiary-care academic medical center. Patient(s): 40 ASA physical status I and II nonlaboring women undergoing elective cesarean delivery of term, uncomplicated, singleton…	2000	Journal of Clinical Anesthesia	12	5	378-382	Tsen 2000
128	Efficacy of intravenous infusion of acetaminophen for intrapartum analgesia	Zutshi, V.; Usha Rani, K.; Marwah, S.; Patel, M.	Introduction: The intensity of pain experienced by women in labour, has been found to affect the progress of labour, foetal well-being and maternal psychology. Adverse effects associated with commonly used opioids for providing intrapartum analgesia have created a need for an alternative non-opioid drug. Aim(s): To evaluate the efficacy of an intravenous infusion of 1000 mg of acetaminophen as an…	2016	Journal of Clinical and Diagnostic Research	10	8	QC18-QC21	Zutshi 2016
129	Randomised trial of intravenous infusion of ephedrine or mephentermine for management of hypotension during spinal anaesthesia for Caesarean section	Kansal, A.; Mohta, M.; Sethi, A. K.; Tyagi, A.; Kumar, P.	This study compared the effects of intravenous infusions of ephedrine and mephentermine for maintenance of maternal arterial pressure and neonatal outcome in pregnant women receiving subarachnoid block for lower segment Caesarean section. Sixty patients who developed hypotension following subarachnoid block for Caesarean section were randomly divided into two groups of 30 each to receive an intra…	2005	Anaesthesia	60	1	28-34	Kansal 2005
133	Is ephedrine infusion more effective at preventing hypotension than traditional prehydration during spinal anaesthesia for caesarean section in African parturients?	Desalu, I.; Kushimo, O. T.	BACKGROUND: Hypotension following spinal anaesthesia for caesarean section may result in maternal nausea and vomiting and decreased uteroplacental blood flow with possible fetal acidaemia. Numerous methods have been tried to minimise hypotension. In developing countries where resources are limited, this study aimed to compare a standard infusion of ephedrine with traditional prehydration to preve…	2005	Int	14	4	294-9	Desalu 2005
134	Efficacy and safety of carbetocin applied as an intravenous bolus compared to as a short-infusion for caesarean section: study protocol for a randomised controlled trial	Dell-Kuster, S.; Hoesli, I.; Lapaire, O.; Seeberger, E.; Steiner, L. A.; Bucher, H. C.; Girard, T.	BACKGROUND: The two most commonly used uterotonic drugs in caesarean section are oxytocin and carbetocin, a synthetic oxytocin analogue. Carbetocin has a longer half-life when compared to oxytocin, resulting in a reduced use of additional uterotonics. Oxytocin is known to cause fewer cardiovascular side effects when administered as a short-infusion compared to as an intravenous bolus. Based on th…	2016	Trials	17		155	Dell-Kuster 2016
138	Method of ephedrine administration and nausea and hypotension during spinal anesthesia for cesarean section	Datta, S.; Alper, M. H.; Ostheimer, G. W.; Weiss, J. B.		1982	Anesthesiology	56	1	68-70	Datta 1982
142	Anatomic and physiologic changes in lower extremity venous hemodynamics associated with pregnancy	Cordts, P. R.; Gawley, T. S.	Purpose: The purpose of this study was to describe the physiologic effects of pregnancy on lower extremity venous hemodynamics. Method(s): Eight pregnant women, six with no known venous disease (NVD) and two with documented deep venous obstruction (DVO), were identified in the first trimester (TM) and studied monthly until delivery and once postpartum (pp) by air plethysmography and duplex scan. …	1996	Journal of Vascular Surgery	24	5	763-767	Cordts 1996
143	Evidence that intravenous vasopressors can affect rostral spread of spinal anesthesia in pregnancy	Cooper, D. W.; Jeyaraj, L.; Hynd, R.; Thompson, R.; Meek, T.; Ryall, D. M.; Kokri, M. S.	Background: The authors have previously observed an apparent association between rostral spread of spinal anesthesia and choice of intravenous vasopressor given to maintain maternal systolic arterial pressure during cesarean delivery. This study tested the hypothesis that an intravenous infusion of phenylephrine can reduce rostral spread of spinal anesthesia in pregnancy, compared with ephedrine.…	2004	Anesthesiology	101	1	28-33	Cooper 2004
144	Prospective evaluation of systolic arterial pressure control with a phenylephrine infusion regimen during spinal anaesthesia for caesarean section	Cooper, D.; Schofield, L.; Hynd, R.; Selvan, D.; Lloyd, A.; Meek, T.; Winnard, J.	BACKGROUND: Hypotension and nausea occur frequently during spinal anaesthesia for caesarean section. The aim of this evaluation was to assess systolic arterial pressure control with our routine prophylactic intravenous phenylephrine infusion regimen. We audited a local standard for an incidence of hypotension of <= 25% during the first 15 min of anaesthesia. METHODS: One hundred healthy women und…	2012	Int	21	3	245-52	Cooper 2012
146	Techniques for preventing hypotension during spinal anaesthesia for caesarean section	Chooi, C.; Cox, J. J.; Lumb, R. S.; Middleton, P.; Chemali, M.; Emmett, R. S.; Simmons, S. W.; Cyna, A. M.	Background: Maternal hypotension is the most frequent complication of spinal anaesthesia for caesarean section. It can be associated with nausea or vomiting and may pose serious risks to the mother (unconsciousness, pulmonary aspiration) and baby (hypoxia, acidosis, neurological injury). Objective(s): To assess the effects of prophylactic interventions for hypotension following spinal anaesthesia…	2017	Cochrane Database of Systematic Reviews	2017 (8) (no pagination)	CD002251		Chooi 2017
147	Cardiac arrest associated with sulprostone use during caesarean section	Chen, F. G.; Koh, K. F.; Chong, Y. S.	Sulprostone, a synthetic prostaglandin with potent uterotonic action, has been shown to have a low complication rate in a large series. We present a case in which a bolus intravenous injection of sulprostone 30 micrograms was administered to treat postpartum haemorrhage during caesarean section. The 38-year-old patient with no previous cardiac or smoking history developed complete heart block, ve…	1998	Anaesth Intensive Care	26	3	298-301	Chen 1998
149	Prophylactic phenylephrine and fluid co-administration to reduce spinal hypotension during elective caesarean section in a resource-limited setting: a prospective alternating intervention study	Buthelezi, A. S.; Bishop, D. G.; Rodseth, R. N.; Dyer, R. A.	Spinal hypotension is a common and clinically important problem during caesarean section. Current consensus recommendations for resource-rich settings suggest the use of a titrated phenylephrine infusion, in combination with fluid coloading, for prevention of maternal hypotension. In resource-limited settings, where syringe drivers are unavailable, these recommendations advise the addition of 500…	2019	Anaesthesia.	6			Buthelezi 2019
151	Interventions for Intrauterine Resuscitation in Suspected Fetal Distress During Term Labor: A Systematic Review	Bullens, L. M.; Van Runnard Heimel, P. J.; Van Der Hout-Van Der Jagt, M. B.; Oei, S. G.	Importance: Intrauterine resuscitation techniques during term labor are commonly used in daily clinical practice. Evidence, however, to support the beneficial effect of intrauterine resuscitation techniques on fetal distress during labor is limited and sometimes contradictory. In contrast, some of these interventions may even be harmful. Objective(s): To give insight into the current evidence on …	2015	Obstetrical and Gynecological Survey	70	8	524-539	Bullens 2015
154	Intravenous immune globulin in the therapy of peripartum cardiomyopathy	Bozkurt, B.; Villaneuva, F. S.; Holubkov, R.; Tokarczyk, T.; Alvarez Jr, R. J.; MacGowan, G. A.; Murali, S.; Rosenblum, W. D.; Feldman, A. M.; McNamara, D. M.	OBJECTIVES: We sought to evaluate the effect of therapy with intravenous immune globulin on recovery of left ventricular function in women presenting with peripartum cardiomyopathy. BACKGROUND: Peripartum cardiomyopathy is a rare complication of pregnancy that results in significant morbidity and mortality in women of childbearing age. Intravenous immune globulin has been reported to improve left…	1999	Journal of the American College of Cardiology	34	1	177-180	Bozkurt 1999
156	Medical management of the pregnant transplant recipient	Armenti, V. T.; Moritz, M. J.; Davison, J. M.	Retrospective analyses of pregnancies in female renal transplant recipients including case reports, center reports, and questionnaire surveys have, for the most part, reached similar conclusions. In the presence of adequate, stable graft function, these high-risk pregnancies are generally well tolerated, but the majority of the liveborn outcomes are premature and many of the newborns are low birt…	1998	Advances in Renal Replacement Therapy	5	1	14-23	Armenti 1998
157	Safety of phenylephrine in antihypotensive treatment during spinal anesthesia for cesarean section	Anusorntanawat, R.; Uerpairojkit, K.; Thongthaweeporn, N.; Charuluxananan, S.	Objective: In Thailand, hypotension after spinal anesthesia for cesarean section is routinely treated by ephedrine. As incidence of fetal acidosis reportedly increases resulting from placental transfer of ephedrine, phenylephrine, an alpha-1 agonist with less lipid solubility, becomes an alternative. However, the potential development of serious bradycardia after phenylephrine is a concern. The o…	2016	Journal of the Medical Association of Thailand	99	2	188-196	Anusorntanawat 2016
162	Part 4: Advanced life support	Anonymous		2005	Circulation	112	22 SUPPL.	III25-III54	Anonymous 2005
175	Prophylactic insertion of large bore peripheral intravenous catheters in maternity patients for postpartum haemorrhage: A cohort study	Webster, J.; Larsen, E.; Booker, C.; Laws, J.; Marsh, N.	Background: Insertion of a 16 or 18 gauge peripheral intravenous catheter is a potentially painful intervention but one frequently experienced by pregnant women when admitted to hospital. Although the rationale for this practice is 'in case of an emergency bleed', evidence for using large-bore catheters in this population is absent. Aim(s): (i) To identify the proportion of 18 gauge or larger per…	2018	Australian and New Zealand Journal of Obstetrics and Gynaecology	58	5	548-552	Webster 2018
176	Randomized trial of bolus phenylephrine or ephedrine for maintenance of arterial pressure during spinal anaesthesia for Caesarean section	Thomas, D. G.; Robson, S. C.; Redfern, N.; Hughes, D.; Boys, R. J.	Thirty-eight healthy women undergoing elective Caesarean section under spinal anaesthesia at term were allocated randomly to receive boluses of either phenylephrine 100 mug or ephedrine 5 mg for maintenance of maternal arterial pressure. The indication for administration of vasopressor was a reduction in systolic pressure to <= 90% of baseline values. Maternal arterial pressure (BP) and heart rat…	1996	British Journal of Anaesthesia	76	1	61-65	Thomas 1996
178	Comparison between colloid preload and crystalloid co-load in cesarean section under spinal anesthesia: A randomized controlled trial	Tawfik, M. M.; Hayes, S. M.; Jacoub, F. Y.; Badran, B. A.; Gohar, F. M.; Shabana, A. M.; Abdelkhalek, M.; Emara, M. M.	Background Hypotension is a common problem during spinal anesthesia for cesarean delivery. Intravenous fluid loading is used to correct preoperative dehydration and reduce the incidence and severity of hypotension. Different fluid regimens have been studied but colloid preload and crystalloid co-load have not been compared. Methods In this randomized double-blind study, 210 patients scheduled for…	2014	International Journal of Obstetric Anesthesia	23	4	317-323	Tawfik 2014
179	Cardiac arrest and resuscitation with an automatic mechanical chest compression device (LUCAS) due to anaphylaxis of a woman receiving caesarean section because of pre-eclampsia	Vatsgar, T. T.; Ingebrigtsen, O.; Fjose, L. O.; Wikstrom, B.; Nilsen, J. E.; Wik, L.	We report a case of anaphylaxis with pulseless electrical activity (PEA)(verified by ECG and a radial intra-arterial line) in a 30-year-old woman who received 3G Promiten (dextran-1) and a prophylactic intra-venous infusion of Macrodex (dextran) for postoperative thromboembolism during caesarean section for pre-eclampsia in the 24th week of gestation. Manual chest compressions, followed by mechan…	2006	Resuscitation	68	1	155-159	Vatsgar 2006
180	An open-label randomized controlled clinical trial for comparison of continuous phenylephrine versus norepinephrine infusion in prevention of spinal hypotension during cesarean delivery	Vallejo, M. C.; Attaallah, A. F.; Elzamzamy, O. M.; Cifarelli, D. T.; Phelps, A. L.; Hobbs, G. R.; Shapiro, R. E.; Ranganathan, P.	BACKGROUND: During spinal anesthesia for cesarean delivery phenylephrine is the vasopressor of choice but can cause bradycardia. Norepinephrine has both beta- and alpha-adrenergic activity suitable for maintaining blood pressure with less bradycardia. We hypothesized that norepinephrine would be superior to phenylephrine, requiring fewer rescue bolus interventions to maintain blood pressure. METH…	2017	Int	29		18-25	Vallejo 2017
181	Rapid Fluid Administration and the Incidence of Hypotension Induced by Spinal Anesthesia and Ephedrine Requirement: The Effect of Crystalloid Versus Colloid Coloading	Unlugenc, H.; Turktan, M.; Evruke, I. C.; Gunduz, M.; Burgut, R.; Yapicioglu-Yildizdas, H.; Isik, G.	PURPOSE: Spinal anesthesia for caesarean delivery is often associated with hypotension. This study was conducted to evaluate the effects of rapid crystalloid (Lactated Ringer's solution; LRS) or colloid (hydroxyethyl starch; HES) cohydration with a second intravenous access line on the incidence of hypotension and ephedrine requirement during spinal anesthesia for cesarean section. METHODS: We st…	2015	Middle East journal of anaesthesiology	23	3	273-281	Unlugenc 2015
182	Effects of crystalloid and colloid preload on blood volume in the parturient undergoing spinal anesthesia for elective Cesarean section	Ueyama, H.; He, Y. L.; Tanigami, H.; Mashimo, T.; Yoshiya, I.	BACKGROUND: The role of crystalloid preloading to prevent hypotension associated with spinal anesthesia in parturients during cesarean section has been challenged. Direct measurement of blood volume should provide insight regarding the volume-expanding effects. The aim of the current study was to clarify the effects of volume preload with either crystalloid or colloid solution on the changes in b…	1999	Anesthesiology	91	6	1571-6	Ueyama 1999
185	Lower incidence of hypotension following spinal anesthesia with 6% hydroxyethyl starch preload compared to 9 saline solution in caesarean delivery	Romdhani, C.; Trabelsi, W.; Lebbi, A.; Naas, I.; Elaskri, H.; Gharsallah, H.; Rachdi, R.; Ferjani, M.	BACKGROUND: Hypotension is a common complication following spinal anesthesia for cesarean delivery. Techniques to prevent hypotension include preloading intravenous fluid. AIM: To compare the effect of two preloading regimens: 6% hydroxyethyl starch (HES) and 9 saline solution, to prevent hypotension after spinal anesthesia in cesarean delivery. METHODS: 105 patients undergoing intrathecal anesth…	2014	Tunis Med	92	6	406-10	Romdhani 2014
187	The effects of varying volumes of crystalloid administration before cesarean delivery on maternal hemodynamics and colloid osmotic pressure	Park, G. E.; Hauch, M. A.; Curlin, F.; Datta, S.; Bader, A. M.	The value of intravenous crystalloid administration in preventing spinal-induced hypotension in the parturient has recently been questioned. Also, the association between increasing crystalloid volume and decreasing postpartum colloid osmotic pressure (COP) raises concern regarding the risk of maternal and fetal pulmonary edema. To study the dose-response effect of varying amounts of crystalloid …	1996	Anesthesia and Analgesia	83	2	299-303	Park 1996
188	Colloid cohydration and variable rate phenylephrine infusion effectively prevents postspinal hypotension in elective Cesarean deliveries	Sen, I.; Hirachan, R.; Bhardwaj, N.; Jain, K.; Suri, V.; Kumar, P.	Background: Prevention of post-spinal hypotension in obstetric patients can be accomplished using intravenous fluid expansion and prophylactic use of sympathomimetic drugs. The affect of combination of colloids and phenylephrine infusion on maternal hemodynamics has not been widely studied and there is no consensus about the dosage required and time of starting its administration. Material(s) and…	2013	Journal of Anaesthesiology Clinical Pharmacology	29	3	348-355	Sen 2013
191	Complications of central venous catheters during pregnancy and postpartum: a case series	Nuthalapaty, F. S.; Beck, M. M.; Mabie, W. C.	Objective: The objective of the study was to determine the incidence of central venous catheter-related complications during pregnancy and postpartum. Study Design: This was a retrospective case series of patients admitted for obstetric care and who had a central venous catheter placed between Jan. 1, 2000, and July 10, 2006. Patient characteristics, catheter indication, and associated complicati…	2009	American Journal of Obstetrics and Gynecology	201	3	311.e1-311.e5	Nuthalapaty 2009
193	Prevention of hypotension during spinal anesthesia for cesarean delivery: An effective technique using combination phenylephrine infusion and crystalloid cohydration	Ngan Kee, W. D.; Khaw, K. S.; Ng, F. F.	Background: Many methods for preventing hypotension during spinal anesthesia for cesarean delivery have been investigated, but no single technique has proven to be effective and reliable. This randomized study studied the efficacy of combining simultaneous rapid crystalloid infusion (cohydration) with a high-dose phenylephrine infusion. Method(s): Nonlaboring patients scheduled to undergo electiv…	2005	Anesthesiology	103	4	744-750	NganKee 2005
194	Managing hypotension during anaesthesia for caesarean section	Ngan Kee, W. D.	Hypotension is the most important common complication of regional anaesthesia for caesarean section. Methods of managing hypotension include lateral uterine displacement, mechanical leg compression, intravenous prehydration, and use of vasopressors. Uterine displacement is accepted as standard, although the optimal degree of tilt is unknown, and most anaesthetists overestimate the amount of tilt …	2007	Anaesthesia and Intensive Care Medicine	8	7	286-289	NganKee 2007
195	Management of post-partum haemorrhage in the Timor Leste National Ambulance Service	Moores, J.; de Jesus, G. A.	Objective: Timor Leste has one of the highest maternal death rates in the world at 215 per 100 000 live births.<sup>1</sup> Post-partum haemorrhage (PPH) accounts for 27% of maternal deaths globally. Annually the Timor Leste National Ambulance Service (TLNAS) attends over 20 000 cases, of which 2% are diagnosed with PPH. The objective of this study was to evaluate prehospital care of PPH patients…	2018	EMA - Emergency Medicine Australasia	30	6	814-819	Moores 2018
197	Prevention and treatment of postpartum hemorrhage: New advances for low-resource settings	Miller, S.; Lester, F.; Hensleigh, P.	Postpartum hemorrhage due to uterine atony is the primary direct cause of maternal mortality globally. Management strategies in developed countries involve crystalloid fluid replacement, blood transfusions, and surgery. These definitive therapies are often not accessible in developing countries. Long transports from home or primary health care facilities, a dearth of skilled providers, and lack o…	2004	Journal of Midwifery and Women's Health	49	4	283-292	Miller 2004
200	Incidence, outcomes and guideline compliance of out-of-hospital maternal cardiac arrest resuscitations: A population-based cohort study	Lipowicz, A. A.; Cheskes, S.; Gray, S. H.; Jeejeebhoy, F.; Lee, J.; Scales, D. C.; Zhan, C.; Morrison, L. J.; Rescu, Investigators	BACKGROUND: Incidence and survival rates after cardiac arrest among pregnant women are reported for in-hospital cardiac arrests; the incidence and outcomes of maternal out-of-hospital cardiac arrest (OHCA) are unknown. Current cardiopulmonary resuscitation guidelines contain recommendations specific to this population; compliance with these has not been investigated. OBJECTIVE: To report maternal…	2018	Resuscitation	132		127-132	Lipowicz 2018
206	Major obstetric hemorrhage	Le Gouez, A.; Mercier, F. J.	Major obstetric hemorrhage is a challenge for anesthesiologists because it remains responsible for over 10% of maternal deaths in high-income countries. A standardized multidisciplinary management, described in locally validated protocols and based on international guidelines is mandatory to prevent these deaths. The first difficulty relies on the systematic underestimation of the bleeding. Colle…	2016	Transfusion Clinique et Biologique	23	4	229-232	LeGouez 2016
209	Inferior vena caval occlusion in late pregnancy	Scott, D. B.		1974	Clin Anesth	10	2	37-50	Scott 1974
210	Effect of timing of fluid bolus on reduction of spinal-induced hypotension in patients undergoing elective cesarean delivery	Williamson, W.; Burks, D.; Pipkin, J.; Burkard, J. F.; Osborne, L. A.; Pellegrini, J. E.	Spinal-induced hypotension remains the most common complication associated with spinal anesthesia for cesarean delivery. Recent evidence indicates that a 20-mL/kg bolus via pressurized infusion system administered at the time of subarachnoid block (SAB) (coload) may provide better prophylaxis than the traditional administration of a 20-mL/kg crystalloid infusion (preload) approximately 20 minutes…	2009	Aana J	77	2	130-6	Williamson 2009
211	Comparison of two different approaches to hypotension following spinal anaesthesia for caesarean delivery: Effects on neonatal and maternal wellbeing	Zasa, M.; Conci, E.; Marchignoli, A.; Pini, R.; Passeri, L.; Fanelli, G.; Cornini, A.	Background: Maternal hypotension during spinal anaesthesia for Caesarean delivery is a common event, with potential detrimental consequences. We led a prospective, randomized study to compare the effects of two strategies on neonatal and maternal wellbeing. Method(s): Parturients scheduled for elective Caesarean section in spinal anaesthesia were preoperatively studied with a supine stress test. …	2015	Acta Biomedica	86	1	45-52	Zasa 2015
212	Randomized study of intravenous fluid preload before epidural analgesia during labour	Kinsella, S. M.; Pirlet, M.; Mills, M. S.; Tuckey, J. P.; Thomas, T. A.	We performed a randomized controlled trial of the effect of intravenous fluid preload on maternal hypotension and fetal heart rate (FHR) changes in labour after the first epidural injection. Group 1 (49 women) received 1 litre of crystalloid preload. Group 2 (46 women) received no preload. No statistically significant difference was shown between the two groups for either of the outcomes. Hypoten…	2000	British Journal of Anaesthesia	85	2	311-313	Kinsella 2000
213	A Comparison Between the Effects of Preloading with Ringer's Solution and Voluven on Hemodynamic Changes in Patients Undergoing Elective Cesarean Section Under Spinal Anesthesia	Khosravi, F.; Alishahi, M.; Khanchemehr, Y.; Jarineshin, H.	Introduction: The most common complications after spinal anesthesia for Cesarean section is hypotension. Administration of intravenous crystalloid or colloid fluid before the induction of anesthesia is a way to prevent it. Aim(s): The aim of this study was to compare the effects of preloading with ringer's solution and Voluven on hemodynamic changes in patients underwent elective Caesarean sectio…	2019	Medical archives (Sarajevo, Bosnia and Herzegovina)	73	1	44-48	Khosravi 2019
216	Comparison of intravenous colloid and colloid-crystalloid combination in hypotension prophylaxis during spinal anesthesia for cesarean section	Idehen, H. O.; Amadasun, F. E.; Ekwere, I. T.	Context: Many studies comparing different intravenous fluid types usually do not use equipotent volumes of three to one crystalloid to colloid ratio in such comparisons. Conflicting results emanate from such studies. Aim(s): This study was designed to compare the efficacy of equipotent volumes of colloid and crystalloid-colloid combination in spinal anesthesia-induced hypotension prophylaxis duri…	2014	Nigerian Journal of Clinical Practice	17	3	309-313	Idehen 2014
217	Volume preload: Lack of effect in the prevention of spinal-induced hypotension at caesarean section	Husaini, S. W.; Russell, I. F.	A randomized double-blind study of 40 women was performed to compare blood pressure changes between two groups of women following induction of spinal anaesthesia for elective caesarean section. One group received a 1 L Ringer's solution preload, administered over 10 min, before spinal anaesthesia while the other group received no preload. In both groups a prophylactic infusion of ephedrine (60 mg…	1998	International Journal of Obstetric Anesthesia	7	2	76-81	Husaini 1998
219	Managing hypotension during anaesthesia for caesarean section	Hobbs, A.; Cockerham, R.	Hypotension is a significant problem during regional anaesthesia for caesarean section. This may be associated with both maternal and fetal morbidity. Risk factors should be identified. The technique of neuraxial blockade can be modified to reduce the incidence. Management techniques include left uterine displacement, mechanical leg compression, intravenous fluids and vasopressors. Novel alternat…	2013	Anaesthesia and Intensive Care Medicine	14	7	280-282	Hobbs 2013
220	Intravenous Oxytocin Use to Decrease Blood Loss during Scheduled Cesarean Delivery: A Randomized Double-Blinded Controlled Trial (OXYTRIAL)	Ghulmiyyah, L. M.; Usta, I. M.; Ghazeeri, G.; Taher, N.; Abu-Ghannam, G.; Tamim, H.; Nassar, A. H.	Objective The objective of this study was to determine the optimal dose of intravenous oxytocin administered during cesarean delivery (CD) to decrease the amount of blood loss. Methods Out of a total of 226 women presenting for CD, 189 patients were randomized into three groups by a computer-generated random number sequence table. Low-risk women with singleton term pregnancies undergoing schedule…	2016	American Journal of Perinatology.	30			Ghulmiyyah 2016
221	Intravenous Oxytocin Use to Decrease Blood Loss during Scheduled Cesarean Delivery: A Randomized Double-Blinded Controlled Trial (OXYTRIAL)	Ghulmiyyah, L. M.; Usta, I. M.; Ghazeeri, G.; Taher, N.; Abu-Ghannam, G.; Tamim, H.; Nassar, A. H.	Objective The objective of this study was to determine the optimal dose of intravenous oxytocin administered during cesarean delivery (CD) to decrease the amount of blood loss. Methods Out of a total of 226 women presenting for CD, 189 patients were randomized into three groups by a computer-generated random number sequence table. Low-risk women with singleton term pregnancies undergoing schedule…	2017	American Journal of Perinatology	34	4	379-387	Ghulmiyyah 2017
227	Assessment of volume preload on uteroplacental blood flow during epidural anaesthesia for Caesarean section	Gogarten, W.; Struemper, D.; Gramke, H. F.; Van Aken, H.; Buerkle, H.; Durieux, M.; Marcus, M. A. E.	Background and objective: Epidural and spinal anaesthesia are the preferred mode of anaesthesia for Caesarean section. Volume preloading is recommended to prevent maternal hypotension and a reduction in uteroplacental blood flow, although positive effects of volume preloading on maternal cardiac output and arterial pressure are debatable. Doppler measurements of the umbilical artery beyond derivi…	2005	European Journal of Anaesthesiology	22	5	359-362	Gogarten 2005
228	Comparative study between ephedrine infusion vs. CO/post loading of fluids for prevention of hypotension in emergency cesarean section under spinal anesthesia	El-Mekawy, N. M.	Introduction: Maternal hypotension is the most common complication during cesarean section under spinal anesthesia. The aim of this study was to compare the effectiveness of CO/post loading of fluids versus immediate post spinal infusion of ephedrine in prevention of hypotension. Method(s): Ninety healthy pregnant patients ASA I with single term fetus arrived to the operating room with nonlife th…	2012	Egyptian Journal of Anaesthesia	28	3	193-198	El-Mekawy 2012
230	Crystalloid preload versus rapid crystalloid administration after induction of spinal anaesthesia (coload) for elective caesarean section	Dyer, R. A.; Farina, Z.; Joubert, I. A.; Du Toit, P.; Meyer, M.; Torr, G.; Wells, K.; James, M. F.	Current methods of crystalloid preload administration prior to spinal anaesthesia for elective caesarean section are relatively ineffective in preventing hypotension. This study examined the relevance of the timing of the fluid administered. Fifty women were randomly allocated to receive either 20 ml x kg(-1) of crystalloid solution during 20 minutes prior to induction of spinal anaesthesia (prel…	2004	Anaesth Intensive Care	32	3	351-7	Dyer 2004
236	Caesarean section in isobaric spinal anesthesia with and without direct preoperative hydration with crystalloids	Damevski, V.; Damevska, G.; Krivasija, M.; Nojkov, O.; Sivevski, A.	Background: Because the direct preoperative hydration with crystalloids (20 ml/kg) does not adequately prevent spinal hypotension during cesarean section, the authors investigated whether a continuous intravenous infusion of ephedrine (50 mg/500 ml of Ringer solution) without preoperative hydration would prevent the spinal hypotension more effectively. Method(s): Forty parturients with ASA status…	2011	Bratislava Medical Journal	112	8	459-462	Damevski 2011
237	Prediction of hypotension during spinal anesthesia for Cesarean section and its relation to the effect of crystalloid or colloid preload	Dahlgren, G.; Granath, F.; Wessel, H.; Irestedt, L.	BACKGROUND: If parturients prone to develop caval compression in the supine position were identified before delivery, this might be a method of predicting hypotension during caesarean section under spinal anesthesia. Colloid preloading is superior to crystalloid in reducing the risk for spinal anesthetic-induced hypotension. It is postulated that parturients preoperatively susceptible to the supi…	2007	Int	16	2	128-34	Dahlgren 2007
241	Resuscitation in massive obstetric haemorrhage using an intraosseous needle	Chatterjee, D. J.; Bukunola, B.; Samuels, T. L.; Induruwage, L.; Uncles, D. R.	A 38-year-old woman experienced a massive postpartum haemorrhage 30 minutes after emergency caesarean delivery. The patient became severely haemodynamically compromised with an unrecordable blood pressure. Rapid fluid resuscitation was limited by the capacity of the intravenous cannula in place at the time and inability to establish additional vascular access using conventional routes in a timely…	2011	Anaesthesia	66	4	306-310	Chatterjee 2011
242	Fluid preload before spinal anaesthesia in Caesarean section: The effect on neonatal acid-base status	Chanimov, M.; Gershfeld, S.; Cohen, M. L.; Sherman, D.; Bahar, M.	Background and objective: We evaluated the effect of two different preload solutions: (i) Ringer's lactate (compound sodium lactate intravenous infusion BP) and (ii) 0.9% sodium chloride solution on the neonatal acid-base status of the newborn infants. The two standard regimens were compared to detect a possible difference. Method(s): A 2 L crystalloid fluid bolus was administered immediately bef…	2006	European Journal of Anaesthesiology	23	8	676-679	Chanimov 2006
244	Peripherally Inserted Central Catheter (PICC) Complications during Pregnancy	Cape, A. V.; Mogensen, K. M.; Robinson, M. K.; Carusi, D. A.	Background: Peripherally inserted central catheters (PICCs) are routinely used in women with hyperemesis gravidarum. However, little is known about the consequences of PICC insertion in these patients. Our aim was to analyze PICC-related complication rates among pregnant women. Material(s) and Method(s): Pregnant women with PICC insertion between January 2000 and June 2006 were studied retrospect…	2014	Journal of Parenteral and Enteral Nutrition	38	5	595-601	Cape 2014
245	Effects of isothermic crystalloid coload on maternal hypotension and fetal outcomes during spinal anesthesia for cesarean section: A randomized controlled trial	Canturk, M.; Karbancioglu Canturk, F.	Objective: Spinal anesthesia induced hypotension (SAIH) is a common occurrence during spinal anesthesia for cesarean section resulting in perturbing effects on maternal and fetal outcomes. Previous studies conducted to attenuate SAIH focused on the timing of intravenous fluid infusion and demonstrated the superiority of coload strategy on traditional preload strategy but neither of them focused o…	2019	Taiwanese Journal of Obstetrics and Gynecology	58	3	428-433	Canturk 2019
246	Diagnosis and management of pulmonary embolism in pregnancy	Broder, S.; Pare, P.	Pulmonary embolism in pregnancy is a significant and under-recognized problem. In British Columbia, where there are 46,000 pregnancies per year, it is estimated that there are approximately 160 pulmonary embolisms per year and one maternal death every two years secondary to pulmonary embolism. A complete assessment for suspected pulmonary embolus can be performed without putting the fetus at sign…	1996	Canadian Respiratory Journal	3	3	187-191	Broder 1996
247	Prophylactic Phenylephrine Infusions to Reduce Severe Spinal Anesthesia Hypotension During Cesarean Delivery in a Resource-Constrained Environment	Bishop, D. G.; Cairns, C.; Grobbelaar, M.; Rodseth, R. N.	Phenylephrine infusions are considered as standard management for obstetric spinal hypotension, but there remains reluctance to implement them in resource-limited contexts. This prospective, alternating intervention study of patients undergoing elective or urgent cesarean delivery under spinal anesthesia compared a vasopressor bolus strategy to fixed-rate, low-dose prophylactic phenylephrine infu…	2017	Anesth Analg	125	3	904-906	Bishop 2017
249	Comparison of bolus phenylephrine, ephedrine and mephentermine for maintenance of arterial pressure during spinal anesthesia in cesarean section	Bhattarai, B.; Bhat, S. Y.; Upadya, M.	Introduction: Hypotension is common following spinal anesthesia. Various vasopressors have been indicated to prevent it. The study compares three such agents namely phenylephrine, ephedrine and mephentermine. Method(s): The study included 90 patients undergoing elective and emergency cesarean section who developed hypotension following subarachnoid blockade. Parturient were randomly divided into …	2010	Journal of the Nepal Medical Association	49	1	23-28	Bhattarai 2010
251	Improved clinical management but not patient outcome in women with postpartum haemorrhage - An observational study of practical obstetric team training	Baldvinsdottir, T.; Blomberg, M.; Lilliecreutz, C.	Objective Postpartum haemorrhage (PPH) is the most common obstetric emergency. A well-established postpartum haemorrhage protocol in the labour ward is crucial for effective treatment. The aim of the study was to investigate if practical obstetric team training improves the patient outcome and clinical management of PPH. Setting The practical obstetric team training (PROBE) at Linkoping Universit…	2018	PLoS ONE	13 (9) (no pagination)	e0203806		Baldvinsdottir 2018
254	Oxytocin administration during cesarean delivery: Randomized controlled trial to compare intravenous bolus with intravenous infusion regimen	Bhattacharya, S.; Ghosh, S.; Ray, D.; Mallik, S.; Laha, A.	Background: Oxytocin is routinely administered during cesarean delivery for uterine contraction. Adverse effects are known to occur after intravenous oxytocin administration, notably tachycardia, hypotension, and electrokardiogram (EKG) changes, which can be deleterious in high-risk patients. Aims and Objectives: To compare the hemodynamic changes and uterotonic effect of equivalent dose of oxyto…	2013	Journal of Anaesthesiology Clinical Pharmacology	29	1	32-35	Bhattacharya 2013
259	Plasma volume expansion in pregnancy hypertension	Allen, D. G.; Davey, D. A.; Dacre, D.	Stabilised human serum 500 ml was infused intravenously over 90 minutes in 14 hypertensive women in late pregnancy, and the haemodynamic changes were investigated and compared with those in 7 similar women who were not treated. There was a significant mean increase of 1,85 l in plasma volume, a decrease in diastolic and systolic blood pressure, and an increase in central venous pressure (CVP), pu…	1988	Samj, S	73	9	518-21	Allen 1988
260	Comparison of hydroxyethyl starch 6% and crystalloids for preloading in elective caesarean section under spinal anesthesia	Alimian, M.; Mohseni, M.; Safaeian, R.; Faiz, S. H.; Majedi, M. A.	BACKGROUND: Although controversial, many studies have shown effectiveness of colloid loading as a substitute for crystalloids on reducing the incidence of hypotension in spinal anesthesia. This study was conducted to compare the effects of three intravenous fluid regimens on hemodynamic changes following spinal anesthesia in cesarean section. The regimens included 6% Hydroxyethylstarch 130/0.4 (H…	2014	Medical archives (Sarajevo, Bosnia and Herzegovina)	68	4	279-281	Alimian 2014
262	Cardiovascular Effects of Rapid Intravenous Injection of Synthetic Oxytocin during Elective Cesarean Section	Anderson, T. W.; Depadua, C. B.; Stenger, V.; Prystowsky, H.		1965	Clin Pharmacol Ther	6		345-9	Anderson 1965
265	A low plasma volume in formerly preeclamptic women predisposes to the recurrence of hypertensive complications in the next pregnancy	Aardenburg, R.; Spaanderman, M. E.; van Eijndhoven, H. W.; de Leeuw, P. W.; Peeters, L. L.	BACKGROUND: Formerly preeclamptic women with a subnormal plasma volume (PV) have an increased risk to develop a hypertensive disorder in a subsequent pregnancy as compared to women with normal PV. In the current study we tested the hypothesis that formerly preeclamptic women who develop recurrent disease in their next pregnancy differ from their counterparts with an uneventful next pregnancy by a…	2006	J Soc Gynecol Investig	13	8	598-603	Aardenburg 2006
